# Supplementary material for: Increased expression of caspase 1 during active phase of connective tissue disease
Source: PeerJ. 2019 Jul 22;7:e7321. doi: 10.7717/peerj.7321 (PMC6657674; doi:10.7717/peerj.7321)
Supplement: Data S1 [file peerj-07-7321-s001.xlsx]

## Sheet: Sheet1
group	serial number	sex	age	connective tissue disease	active/stable	CRP	PCT	ESR	WBC	N	L	ALT	TB	BUN	Cr	cas1	cas4	cas5	cd14
1	1	male	61	undifferentiated	active	16	not available	60	3.06	0.382	0.428	12	6.7	4.75	73	485.66	140.929	195.841	245.843
1	2	female	70	undifferentiated	active	2.53	not available	10	4.42	0.576	0.351	14	13.6	13.6	54	519.02	173.293	347.944	267.534
1	3	female	51	undifferentiated	active	8.72	not available	32	6.24	0.467	0.434	18	5.9	4.83	56	315.42	245.357	279.341	204.007
1	4	female	52	rheumatoid arthritis	active	17	not available	30	5.36	0.73	0.22	13	6.5	2.9	24	446.24	252.891	290.818	249.254
1	5	female	74	rheumatoid arthritis	active	13.1	not available	100	6.57	0.485	0.422	13	6.8	6.1	91	326.74	272.498	364.188	215.736
1	6	female	40	undifferentiated	active	24.1	not available	45	6.55	0.682	0.24	5	3.8	2.1	48	513.81	127.087	205.763	237.255
1	7	female	67	rheumatoid arthritis	active	46.8	0.04	60	3.93	0.499	0.399	15	8.4	5.73	66	508.92	171.724	175.141	145.092
1	8	male	85	undifferentiated	active	116	2.09	75	14.52	0.911	0.079	17	9.5	21.2	95	548.07	128.799	296.75	183.591
1	9	male	29	undifferentiated	active	4.5	0.04	25	3.82	0.524	0.38	38	11.9	2.82	72	518.29	225.265	419.656	244.224
1	10	female	73	undifferentiated	active	19	not available	not available	10.12	0.857	0.104	96	13.2	4.6	37	471.56	152.973	258.226	305.445
1	11	male	73	rheumatoid arthritis	active	88.7	0.71	38	10.65	0.749	0.168	8	17.7	13.41	59	529.34	168.384	228.406	124.088
1	12	male	63	ANCA-associated vasculitis	active	3.2	not available	20	12.33	0.702	0.279	18	6.2	7.1	63	498.92	137.647	177.835	97.8819
1	13	female	52	rheumatoid arthritis	active	1.78	not available	19	7.35	0.472	0.441	16	10.6	9.01	115	421.62	171.238	214.416	145.656
1	14	female	76	undifferentiated	active	2.64	not available	not available	4.55	0.536	0.398	23	18.1	6.12	72	480.61	179.943	222.862	143.473
1	15	male	59	rheumatoid arthritis	active	18	not available	98	7.15	0.708	0.2	7	5.1	4.92	56	446.98	131.311	161.85	113.979
1	16	female	73	undifferentiated	active	5.81	not available	10	2.87	0.481	0.369	143	11.1	3.45	52	525.02	199.008	278.874	127.204
1	17	female	62	undifferentiated	active	2.05	not available	7	4.16	0.496	0.425	57	21.2	5.02	68	456.35	531.613	160.995	128.039
1	18	female	84	rheumatoid arthritis	active	81.5	not available	130	6.55	0.682	0.22	11	6.5	3.17	59	517.13	594.258	203.587	209.356
1	19	female	68	rheumatoid arthritis	active	52.7	not available	111	3.44	0.585	0.304	4	9.2	6.28	44	512.92	591.005	231.956	188.818
1	20	female	78	Sjogren's syndrome	active	18.2	not available	75	4.33	0.49	0.4566	16	10.2	5.3	61	456.72	210.538	105.242	168.476
1	21	male	92	undifferentiated	active	3.35	not available	18	9.11	0.765	0.159	32	32.9	5.5	79	499.24	242.645	170.14	215.441
1	22	male	81	undifferentiated	active	16	not available	not available	7.13	0.663	0.185	13	8	3.66	75	443.03	168.099	91.8221	153.827
1	23	female	62	undifferentiated	active	1.47	not available	10	5.01	0.479	0.415	31	20.3	7.6	64	256.06	90.8697	44.9813	31.0173
1	24	male	62	undifferentiated	active	2.51	not available	25	10.3	0.712	0.203	27	9.2	5.71	56	434.4	298.156	191.1	234.752
1	25	female	68	Sjogren's syndrome	active	1.46	0.02	5	6.85	0.673	0.228	21	11.4	4.1	61	169.97	169.041	108.921	66.0568
1	26	female	70	rheumatoid arthritis	active	37.7	0.05	90	4.45	0.626	0.216	17	8.8	5.2	52	494.45	261.054	120.657	64.4619
1	27	female	58	undifferentiated	active	15	not available	not available	7.29	0.303	0.599	221	58.2	5	52	420.35	246.156	235.686	128.039
1	28	male	81	undifferentiated	active	26	not available	not available	8.12	0.661	0.122	not available	not available	13.08	152	489.34	195.669	147.394	130.002
1	29	male	72	rheumatoid arthritis	active	60.5	not available	80	8.03	0.761	0.148	15	7.7	8.35	99	516.18	222.696	143.274	64.879
1	30	female	47	undifferentiated	active	1.91	not available	5	5.36	0.853	0.138	31	6.3	5.2	51	422.56	80.9663	184.882	86.0794
1	31	female	52	undifferentiated	active	18	not available	25	5.28	0.63	0.289	134	35.9	4.63	37.8	447.61	131.14	170.84	102.716
1	32	female	61	mixed	active	4.25	not available	20	2.39	0.624	0.28	12	5	6.8	72	502.34	216.103	188.794	159.888
1	33	female	60	Takayasu arteritis	active	14.7	0.06	95	6.69	0.672	0.197	90	8.8	3.6	47	360.57	242.931	218.743	169.899
1	34	male	65	undifferentiated	active	8.57	not available	not available	8.89	0.647	0.267	not available	not available	not available	not available	296.16	243.587	149.389	146.368
1	35	female	68	undifferentiated	active	9.2	0.04	45	3.35	0.55	0.343	29	7	5.1	66	317.63	219.157	157.938	64.1429
1	36	female	82	undifferentiated	active	2	not available	not available	3.07	0.674	0.218	17.1	15.3	6.99	96	443.77	204.63	197.084	116.383
1	37	male	60	rheumatoid arthritis	active	13.8	not available	70	8.05	0.713	0.184	14	8.4	6.4	58	341.79	226.606	186.695	155.692
1	38	male	84	undifferentiated	active	35.1	2.62	20	12.95	0.814	0.14	10	5.6	7.6	86	525.65	226.577	158.119	145.509
1	39	female	75	rheumatoid arthritis	active	4.98	not available	70	5.32	0.662	0.25	5	5.3	3.76	48	468.82	132.823	96.3818	59.8734
1	40	male	86	undifferentiated	active	6.5	not available	45	10.24	0.738	0.144	24	8.9	18	250	545.07	271.699	172.213	131.768
1	41	female	57	undifferentiated	active	1.99	not available	not available	4.54	0.492	0.427	202	14.8	5.86	46	442.04	237.508	175.996	83.7483
1	42	male	68	undifferentiated	active	4.19	not available	16	9.74	0.749	0.121	33	15	6.2	70	499.55	188.591	81.7699	89.0239
1	43	male	66	undifferentiated	active	1.57	not available	15	6.74	0.582	0.328	16	19.5	6.7	104	420.41	182.597	128.196	128.48
1	44	female	44	systemic lupus erythematosus	active	5.06	not available	5	5.48	0.818	0.113	19	15.7	2.9	54	524.86	206.143	171.85	102.176
1	45	female	66	undifferentiated	active	4.45	not available	not available	6.02	0.591	0.312	25	12.8	5.6	70	464.08	228.176	185.789	119.131
1	46	female	63	rheumatoid arthritis	active	84.9	not available	108	6	0.727	0.2	23	6.4	2.84	56	491.34	207.884	148.197	118.886
2	1	male	75	undifferentiated	stable	1	not available	4	7.52	0.678	0.25	19	14.2	5.2	83	251.66	153.258	331.31	198.782
2	2	female	19	dermatomyositis	stable	3.07	not available	25	4.27	0.759	0.183	120	7.8	4.57	60	247.52	167.328	334.406	206.267
2	3	female	68	rheumatoid arthritis	stable	19.3	not available	65	6.09	0.773	0.163	14	6.8	6.79	104	174.79	177.317	337.055	187.737
2	4	male	83	undifferentiated	stable	58.8	0.06	34	11.7	0.867	0.051	43	7.4	9.4	93	212.96	163.475	523.403	305.464
2	5	male	59	undifferentiated	stable	8.68	not available	59	3.84	0.442	0.474	24	6.5	5.3	64	148.76	133.794	352.538	155.988
2	6	male	59	undifferentiated	stable	23.9	0.03	55	5.66	0.61	0.273	19	12	5.6	88	199.7	163.932	469.009	163.997
2	7	female	61	undifferentiated	stable	1.02	not available	not available	4.75	0.635	0.278	21	4.1	9.01	101.3	159.81	173.921	382.943	171.195
2	8	female	42	rheumatoid arthritis	stable	3.32	not available	55	4.38	0.663	0.258	63	10	5.09	67	172.62	132.224	210.585	96.9675
2	9	female	84	undifferentiated	stable	13.6	not available	15	3.92	0.649	0.205	20	24.1	5.3	56	235.17	185.337	87.8085	123.978
2	10	female	72	undifferentiated	stable	1.04	not available	not available	5.55	0.605	0.295	8	24.4	4.5	69	136.94	256.573	214.838	158.082
2	11	female	77	undifferentiated	stable	2.74	not available	20	3.34	0.557	0.308	13	9.8	5.46	74	216.3	283.03	236.252	138.478
2	12	female	17	undifferentiated	stable	1.03	not available	not available	5.67	0.495	0.459	7	13.7	4.7	68	117.82	85.7896	87.9577	6.06752
2	13	female	58	undifferentiated	stable	1.03	not available	not available	5.54	0.544	0.349	18	8.3	3.91	38.1	159.25	258.228	205.064	188.077
2	14	male	65	rheumatoid arthritis	stable	18.8	not available	120	4.8	0.561	0.294	54	10.2	3.63	54	200.69	217.502	191.857	141.515
2	15	female	50	undifferentiated	stable	2	not available	5	3.69	0.559	0.314	15	14.5	4.71	54	219.24	241.247	234.946	202.525
2	16	female	54	undifferentiated	stable	5	not available	not available	4.82	0.509	0.386	28	11.2	not available	not available	103.3	196.439	245.094	171.247
2	17	male	62	dermatomyositis	stable	3	not available	not available	23.4	0.648	0.272	126	17.9	7.11	67.8	261.97	182.711	149.85	97.3339
2	18	female	79	undifferentiated	stable	1.16	not available	22	6.12	0.666	0.224	38	16.8	5.6	66	165.29	172.123	163.243	131.83
2	19	male	75	Temporal arteritis	stable	3.14	not available	not available	5.81	0.486	0.446	15	5.9	7.36	88	255.87	192.015	208.384	294.341
2	20	male	82	undifferentiated	stable	2.1	not available	not available	4.55	0.646	0.22	9	14.8	9.26	107	208.02	144.182	134.591	68.1245
2	21	male	54	undifferentiated	stable	3.64	not available	not available	9.7	0.622	0.241	32	13.4	6.3	95	232.89	157.454	168.503	86.0794
2	22	female	51	undifferentiated	stable	1	not available	20	4.37	0.379	0.458	11	7.8	4.44	48	241.73	174.206	168.988	99.1399
2	23	female	60	undifferentiated	stable	2.4	not available	not available	3.92	0.598	0.344	15	7.3	8.83	105	196.51	241.133	165.742	127.302
2	24	female	69	rheumatoid arthritis	stable	45.7	not available	135	1.85	0.546	0.335	9	3.1	18.6	328	260.78	109.934	143.881	60.1678
2	25	male	80	undifferentiated	stable	3.43	not available	5	5.09	0.55	0.303	16	16.6	7.55	71	160.27	222.097	229.164	135.311
2	26	male	72	undifferentiated	stable	1.4	not available	not available	5.82	0.661	0.203	11	9	6.2	83	207.74	259.17	195.14	109.688
2	27	male	78	undifferentiated	stable	10.1	0.05	50	5.19	0.711	0.179	11	6.9	7.9	127	216.54	292.99	250.205	190.825
2	28	female	72	undifferentiated	stable	1	not available	not available	6.49	0.579	0.327	19.8	14.1	5.17	62	243.66	254.946	191.671	164.835
2	29	male	65	rheumatoid arthritis	stable	11.4	not available	50	7.83	0.721	0.192	44	13.3	6.9	118.1	184.55	311.17	259.42	173.315
2	30	female	59	undifferentiated	stable	0.79	not available	not available	5.37	0.598	0.311	24	8.6	3.6	59	236.12	195.012	168.466	131.281
2	31	female	61	undifferentiated	stable	3.12	0.03	45	6.47	0.414	0.304	21	13.4	3.8	57	134.2	224.123	162.721	110.028
2	32	male	68	undifferentiated	stable	28.1	not available	65	7.17	0.77	0.149	68	10.6	6.8	85	266.29	230.687	174.36	97.2554
2	33	female	62	undifferentiated	stable	2.5	not available	not available	4.93	0.532	0.395	53	18.3	4.59	46.9	205.6	245.442	225.582	103.589
2	34	female	65	undifferentiated	stable	2.13	not available	not available	5.72	0.518	0.364	15	18.7	4.59	63	203.95	242.531	153.692	95.2139
2	35	female	79	rheumatic polymyalgia	stable	14.8	0.04	48	4.73	0.772	0.173	15	6.2	4.9	59	183	164.788	173.651	85.5036
2	36	male	60	rheumatoid arthritis	stable	2.4	not available	20	9.69	0.67	0.241	16	7.6	6.83	85	179.64	184.138	200.065	94.8998
2	37	female	63	Sjogren's syndrome	stable	1.3	not available	not available	7.54	0.633	0.3	25	8	5.6	62.5	241.7	147.436	177.867	113.614
2	38	female	79	undifferentiated	stable	13	not available	>140	7.4	0.866	0.111	22	10.7	3.6	66	125.33	202.204	146.865	75.2175
2	39	female	71	undifferentiated	stable	2.47	0.03	43	5.31	0.591	0.235	16	4.5	5.1	46	160.94	130.369	238.64	118.822
3	1	female	58		healthy control	2.9										195.404	201.984	205.325	188.99
3	2	female	62		healthy control	4.4										225.69	190.015	198.162	178.31
3	3	female	63		healthy control	3.4										234.834	212.002	173.847	144.575
3	4	male	61		healthy control	2.8										201.315	157.06	153.59	135.936
3	5	male	76		healthy control	4.3										193.055	171.649	143.069	94.0384
3	6	female	66		healthy control	3.6										189.165	171.855	152.666	123.268
3	7	male	62		healthy control	4.1										242.109	216.6	154.289	119.373
3	8	male	58		healthy control	4.1										192.424	139.182	162.04	125.097
3	9	female	59		healthy control	6.5										162.643	98.1874	62.2347	27.9196
3	10	female	67		healthy control	4.2										228.671	224.049	167.076	127.641
3	11	female	66		healthy control	4.7										256.911	170.827	158.85	127.668
3	12	female	61		healthy control	2.2										990.924	109.13	145.252	72.626
3	13	female	63		healthy control	1.8										315.639	157.342	197.127	150.166
3	14	male	59		healthy control	4										809.359	1430.21	1362.3	1430.27
3	15	male	63		healthy control	3.5										231.702	276.294	184.76	175.819
3	16	male	59		healthy control	4.3										188.408	203.551	162.599	168.505
3	17	male	77		healthy control	2.3										237.057	215.624	143.825	175.66
3	18	male	60		healthy control	5.4										247.767	179.74	157.703	119.638
3	19	male	59		healthy control	3.7										194.394	200.469	157.199	603.404
3	20	male	63		healthy control	3.6										191.413	175.836	339.741	120.83
3	21	male	73		healthy control	3.7										193.182	203.705	217.3	141.633
3	22	male	73		healthy control	1.7										448.074	938.839	999.12	125.017
3	23	female	68		healthy control	5.5										1056.35	149.02	164.194	136.651
3	24	female	75		healthy control	2.3										159.915	202.704	204.569	165.404
3	25	female	70		healthy control	1.9										190.201	196.077	140.047	181.914
3	26	male	63		healthy control	2.2										246.428	77.2533	207.703	194.608
3	27	female	61		healthy control	2.1										201.972	222.482	314.139	116.14
3	28	male	61		healthy control	5.8										235.592	255.514	213.187	131.669
3	29	female	58		healthy control	2										113.185	222.174	309.915	97.722
3	30	male	57		healthy control	3.6										205.028	166.589	146.343	199.06
3	31	female	65		healthy control	5.1										186.311	738.822	677.293	133.286
3	32	female	66		healthy control	5.6										236.173	185.854	122.448	149.875
3	33	female	66		healthy control	6.7										194.924	194.458	143.279	271.406
3	34	female	65		healthy control	4.4										191.717	184.184	147.21	902.145
3	35	male	62		healthy control	2.2										197.703	205.324	205.717	178.575
3	36	female	57		healthy control	4.9										239.76	228.184	252.192	141.024
3	37	female	58		healthy control	4.8										96.0592	194.998	220.35	142.614
3	38	female	59		healthy control	3.3										183.608	151.357	258.235	320.061
